# Supplementary material for: Increased Lipids in Chlamydomonas reinhardtii by Multiple Regulations of DOF, LACS2, and CIS1
Source: MDPI journal article supplement (doi:10.3390/ijms231710176), 2022-09-05
Supplement: s1 [file s1]

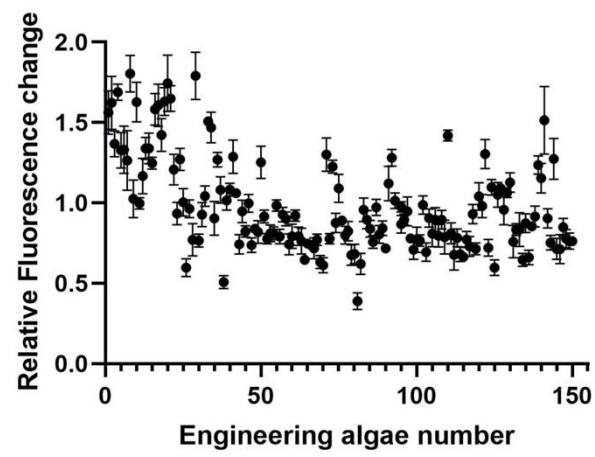

A

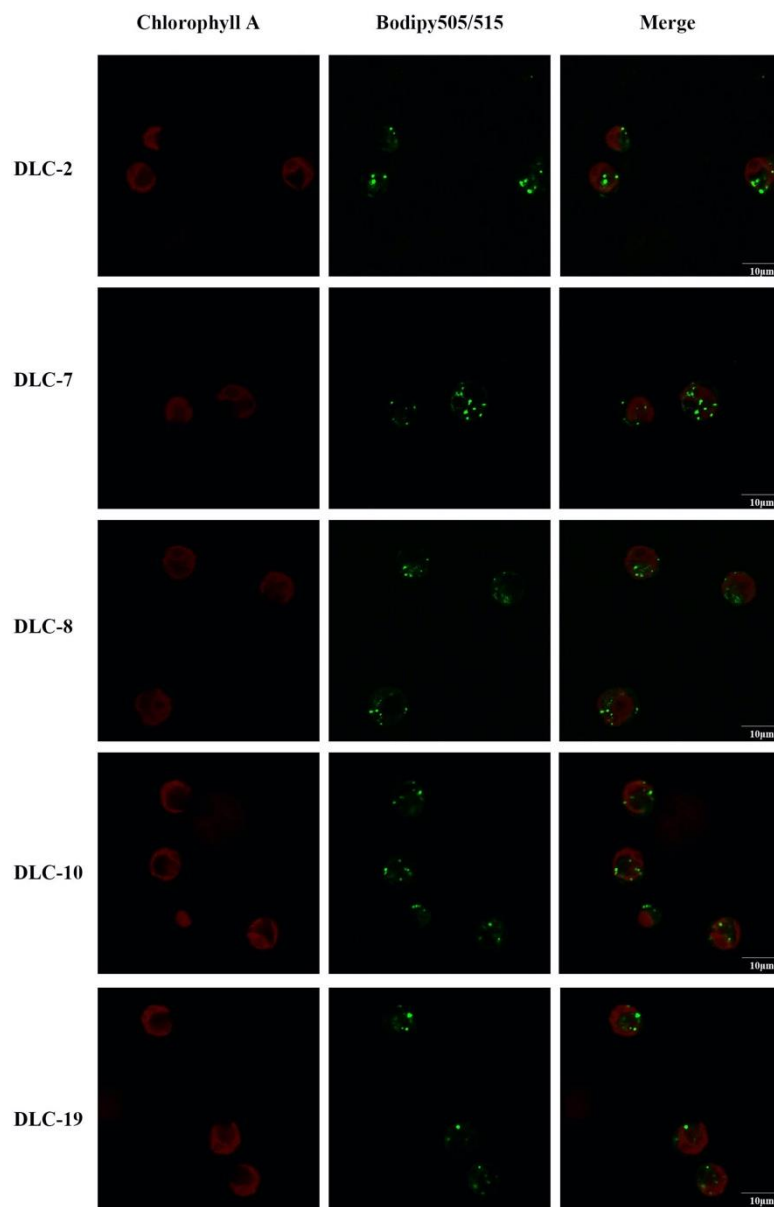

B

**Figure S1.** Analysis of intracellular neutral lipids of transgenic strains after staining with BODIPY. A: The results are shown as fold changes in the fluorescence intensities of the transgenic strains compared with that of the wild type strain. Three biological replicates were conducted. B: The microscope images of some strains when they were stained by BODIFY505/515.

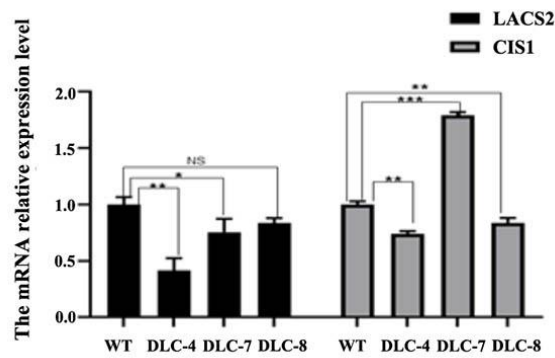

**Figure S2.** qRT-PCR analysis of the mRNA expression levels of LACS2 and CIS1 in different transformants. Only the mRNA expression levels of CIS and LACS2 in DLC-4 showed decreased patterns.

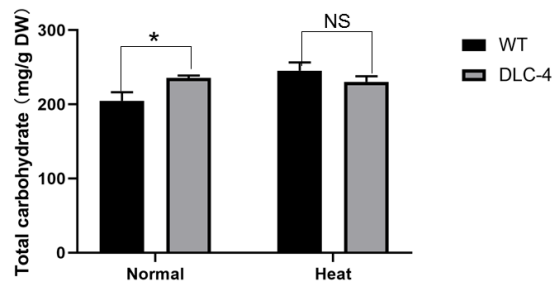

A

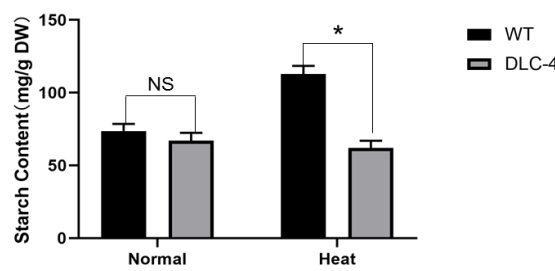

B

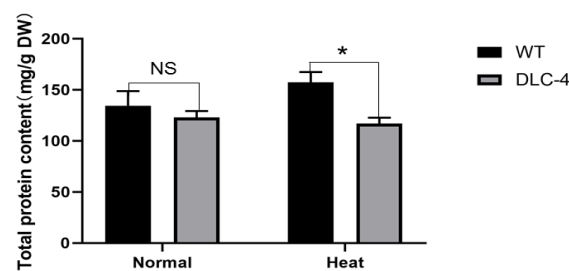

## C

**Figure S3.** Total carbohydrate (a), starch (b) and protein (c) content in DLC-4 and CC849 under normal conditions and after HS. Statistical significance (one-way ANOVA) compared to 0 mM isoprenol is represented by asterisks (\* indicates a difference at the  $p \leq 0.05$  level).

**Table S1.** Primers used.

| Primers | 5'-3'                                               | descriptions                     |
|---------|-----------------------------------------------------|----------------------------------|
| crCIS1F | CAAGTCGCTCACCATGGCGG                                | Used for crCIS cloning           |
| crCIS1R | CAGTGCAACGTCTGCGAAT                                 | Used for crCIS cloning           |
| LACS-R2 | CCGCTCGAGTCAGTGTGTGGCGGGCATTGCGGCGT                 | Used for LACS cloning            |
| LACS-F2 | GGGGTACCATGGCCCCGACAGCGGGG                          | Used for LACS cloning            |
| RAC-R1  | TGGAGTTCATCGCCAACCAC                                |                                  |
| RAC-F1  | CGTCTGCGACATATCAGTG                                 |                                  |
| R-ACSF  | GCGGCGCAAGCGGGACGACAAGGGGCGGTGGCG                   |                                  |
| R-ACSR  | ATGGTGAGCGACTTCGATATCCGGGTGGCGGGCGGCC               |                                  |
| R-CISF  | GGCCGCCGCCACCCGGATATCCAAGTCGCTCACCAT                |                                  |
| R-CISR  | GTCCCAAAACAGTGCAACGTCTGCGACATATCAGTG                |                                  |
| A-CF    | ACTTGCGACAGAACGCGCCTACAGTGGATGACC                   | Used for plasmid pMaa7           |
| A-CR    | AGCGTAGCGTTAGCGTTAGCGAATTCCCAAAACAGTGCAAC<br>GTCTGC | XIR/LACS2-CIS1IR                 |
| RA-CF   | TTGATCAAGGGCCCGCGCCTACACGTGGATGACC                  |                                  |
| RA-CR   | TGATAGTGATAGTAGTAGGAGAATTCCCAAAACAGTGCAA<br>CGTCTGC |                                  |
| T1      | TGATAGTGATAGTA                                      |                                  |
| T2      | AGCGTTAGCGTTAGC                                     |                                  |
| SPR     | GTTCTAGTCGCAAGTATTCTAC                              | Used for transformants screening |
| SPF     | GGGCCCTTGATCCAACCCCTC                               | Used for transformants screening |
| ACCDF   | AGCATATACGGAGTGCGGTG                                |                                  |
| ACCDR   | TGCTATACACCTTGCTGCCC                                |                                  |
| FAT1F   | CATGTATGAGGGCTGCGAGT                                |                                  |
| FAT1R   | ACCTCACTCATCCCCAGTCT                                |                                  |
| DGAT1F  | GCATTCGGACGAGGAGCATA                                |                                  |
| DGAT1R  | CCTGTATCCGTACATGGCCC                                |                                  |
| DGTT4F  | AAGCAGGTGGTGAGGGAAAG                                | Used for qPCR experiments        |
| DGTT4R  | CACACCACCATTAGGAGGCA                                |                                  |
| PAP2F   | GCGTGTTGCCTACTTCCTC                                 |                                  |
| PAP2R   | CACTACTCGCGCCGTACAT                                 |                                  |
| PDAT1F  | GGGTATAGGGGAAGGGGTT                                 |                                  |
| PDAT1R  | CCTGCAATCAATCTCGCTGC                                |                                  |
